# Supplementary material for: Periprocedural Intravenous Heparin During Endovascular Treatment for Ischemic Stroke: Results From the MR CLEAN Registry
Source: PubMed Central journal article supplement — Stroke. 2019 Jul 9;50(8):2147–55. doi: 10.1161/STROKEAHA.119.025329 (PMC6661247; doi:10.1161/strokeaha.119.025329), 2019-07-09
Supplement: str-50-2147-s001.pdf [file str-50-2147-s001.pdf]

# SUPPLEMENTAL MATERIAL ON:

## Periprocedural intravenous heparin during endovascular treatment for ischemic stroke: results from the MR CLEAN

### Registry

*Rob A. van de Graaf, MD<sup>1,2\*</sup>; Vicky Chalos, MD<sup>1,2,3</sup>; Adriaan C.G.M. van Es, MD, PhD<sup>2</sup>; Bart J. Emmer, MD, PhD<sup>4</sup>; Geert J. Lycklama à Nijeholt, MD, PhD<sup>5</sup>; H. Bart van der Worp, MD, PhD<sup>6</sup>; Wouter J. Schonewille, MD, PhD<sup>7</sup>; Aad van der Lugt, MD, PhD<sup>2</sup>; Diederik W.J. Dippel, MD, PhD<sup>1</sup>; Hester F. Lingsma, PhD<sup>3</sup>; Bob Roozenbeek, MD, PhD<sup>1,2</sup>; on behalf of the MR CLEAN Registry investigators*

#### **Affiliations:**

1. Department of Neurology, Erasmus MC University Medical Center, Rotterdam, The Netherlands
2. Department of Radiology & Nuclear Medicine, Erasmus MC University Medical Center, Rotterdam, The Netherlands
3. Department of Public Health, Erasmus MC University Medical Center, Rotterdam, The Netherlands
4. Department of Radiology, Academic Medical Center, Amsterdam, The Netherlands
5. Department of Radiology, Haaglanden Medical Center, Den Haag, The Netherlands
6. Department of Neurology and Neurosurgery, University Medical Center Utrecht, Utrecht, The Netherlands
7. Department of Neurology, Sint Antonius Hospital, Nieuwegein, The Netherlands

1 **Supplemental figure I.** Distribution of doses (IU) heparin administered  
2

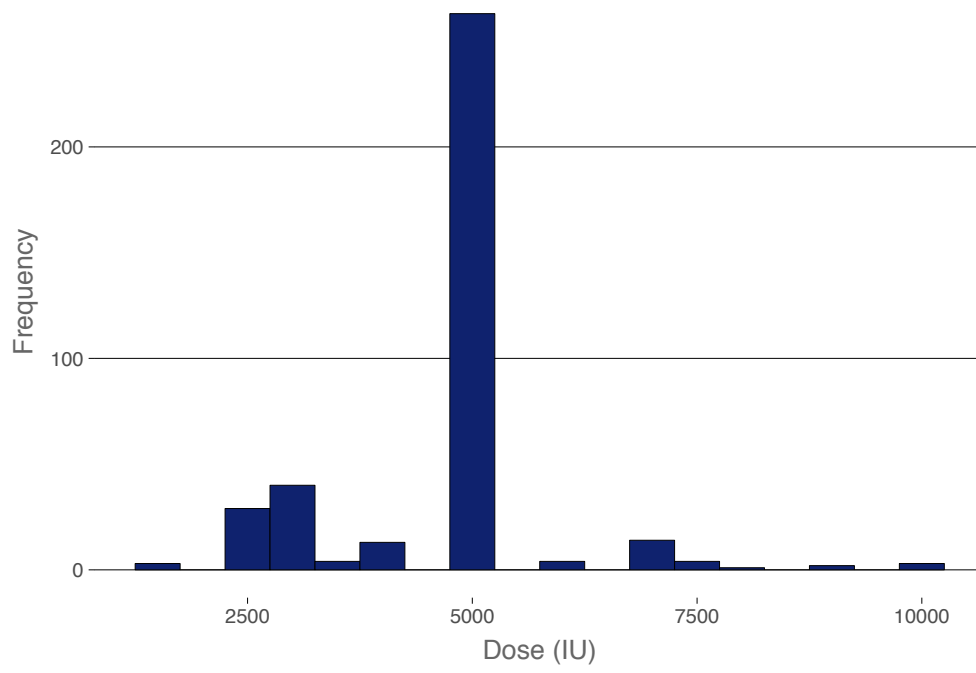

3

1 **Supplemental figure II.** Heparin use over time in Dutch stroke intervention centers (per year  
2 and month)

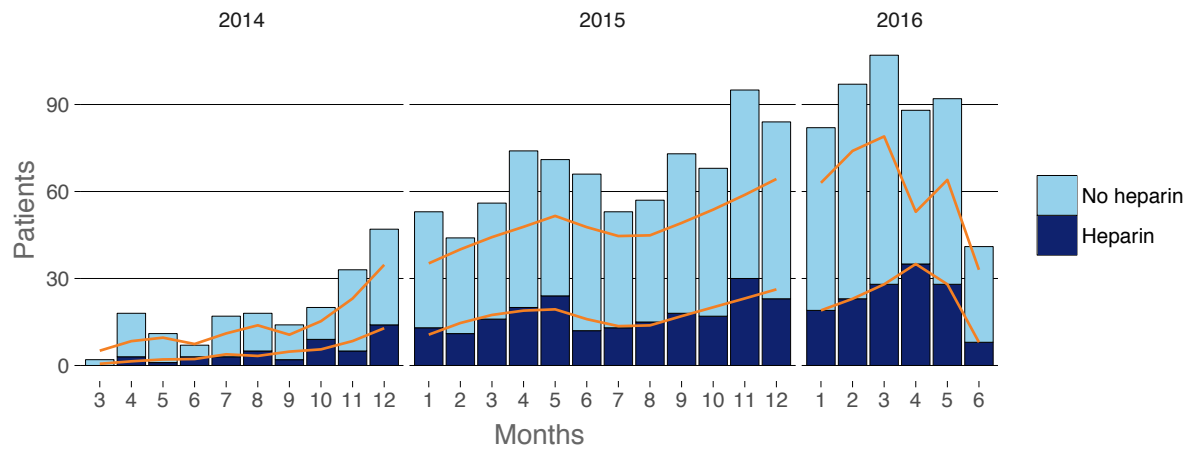

3

1 **Supplemental table I.** Sensitivity analysis of assumed no heparin vs. explicitly registered as  
 2 no heparin

|                                                                                                                                                                                                                                                                                                                                                                                                                     | Explicitly registered as no heparin (n=98) | Assumed no heparin (n=992) | P-value |
|---------------------------------------------------------------------------------------------------------------------------------------------------------------------------------------------------------------------------------------------------------------------------------------------------------------------------------------------------------------------------------------------------------------------|--------------------------------------------|----------------------------|---------|
| <i>Common patient characteristics</i>                                                                                                                                                                                                                                                                                                                                                                               |                                            |                            |         |
| Age                                                                                                                                                                                                                                                                                                                                                                                                                 | 65 (14)                                    | 69 (14)                    | 0.01    |
| Male sex                                                                                                                                                                                                                                                                                                                                                                                                            | 58 (59%)                                   | 530 (53%)                  | 0.32    |
| NIHSS at baseline                                                                                                                                                                                                                                                                                                                                                                                                   | 15 [11, 18]                                | 16 [11, 20]                | 0.06    |
| Ischemia in left hemisphere                                                                                                                                                                                                                                                                                                                                                                                         | 57 (58%)                                   | 506 (52%)                  | 0.25    |
| Systolic blood pressure                                                                                                                                                                                                                                                                                                                                                                                             | 152 (26)                                   | 149 (24)                   | 0.38    |
| Diastolic blood pressure                                                                                                                                                                                                                                                                                                                                                                                            | 83 (19)                                    | 82 (16)                    | 0.46    |
| IV alteplase                                                                                                                                                                                                                                                                                                                                                                                                        | 78 (80%)                                   | 783 (79%)                  | 1.00    |
| INR                                                                                                                                                                                                                                                                                                                                                                                                                 | 1.2 (0.4)                                  | 1.2 (0.4)                  | 0.53    |
| Trombocyte count                                                                                                                                                                                                                                                                                                                                                                                                    | 251 (91)                                   | 251 (93)                   | 0.95    |
| <i>Medical history</i>                                                                                                                                                                                                                                                                                                                                                                                              |                                            |                            |         |
| Previous stroke                                                                                                                                                                                                                                                                                                                                                                                                     | 15 (15%)                                   | 168 (17%)                  | 0.76    |
| Atrial fibrillation                                                                                                                                                                                                                                                                                                                                                                                                 | 18 (18%)                                   | 231 (24%)                  | 0.29    |
| Hypertension                                                                                                                                                                                                                                                                                                                                                                                                        | 50 (51%)                                   | 510 (52%)                  | 0.91    |
| Diabetes mellitus                                                                                                                                                                                                                                                                                                                                                                                                   | 16 (16%)                                   | 182 (18%)                  | 0.70    |
| Myocardial infarction                                                                                                                                                                                                                                                                                                                                                                                               | 13 (13%)                                   | 156 (16%)                  | 0.60    |
| Peripheral arterial disease                                                                                                                                                                                                                                                                                                                                                                                         | 2 (2.1%)                                   | 94 (10%)                   | 0.02    |
| Pre-stroke mRS >2                                                                                                                                                                                                                                                                                                                                                                                                   | 8 (8.2%)                                   | 106 (11%)                  | 0.53    |
| <i>Medication use</i>                                                                                                                                                                                                                                                                                                                                                                                               |                                            |                            |         |
| Antiplatelet                                                                                                                                                                                                                                                                                                                                                                                                        | 28 (29%)                                   | 325 (33%)                  | 0.44    |
| DOAC                                                                                                                                                                                                                                                                                                                                                                                                                | 4 (4.1%)                                   | 28 (2.9%)                  | 0.73    |
| Coumarin                                                                                                                                                                                                                                                                                                                                                                                                            | 8 (8.2%)                                   | 143 (15%)                  | 0.11    |
| Blood pressure lowering medication                                                                                                                                                                                                                                                                                                                                                                                  | 46 (47%)                                   | 522 (54%)                  | 0.27    |
| Statin                                                                                                                                                                                                                                                                                                                                                                                                              | 35 (36%)                                   | 344 (36%)                  | 0.96    |
| <i>Imaging</i>                                                                                                                                                                                                                                                                                                                                                                                                      |                                            |                            |         |
| Occluded segment                                                                                                                                                                                                                                                                                                                                                                                                    |                                            |                            | 0.86    |
| Intracranial ICA                                                                                                                                                                                                                                                                                                                                                                                                    | 7 (7.4%)                                   | 47 (5.0%)                  |         |
| ICA-T                                                                                                                                                                                                                                                                                                                                                                                                               | 20 (21%)                                   | 225 (24%)                  |         |
| M1                                                                                                                                                                                                                                                                                                                                                                                                                  | 55 (59%)                                   | 544 (58%)                  |         |
| M2                                                                                                                                                                                                                                                                                                                                                                                                                  | 11 (12%)                                   | 112 (12%)                  |         |
| Other (e.g., M3, ACA)                                                                                                                                                                                                                                                                                                                                                                                               | 1 (1.1%)                                   | 13 (1.4%)                  |         |
| Reperfusion before intervention (eTICI)                                                                                                                                                                                                                                                                                                                                                                             |                                            |                            | 0.15    |
| 0                                                                                                                                                                                                                                                                                                                                                                                                                   | 76 (84%)                                   | 723 (81%)                  |         |
| 1                                                                                                                                                                                                                                                                                                                                                                                                                   | 8 (8.9%)                                   | 48 (5.4%)                  |         |
| 2A                                                                                                                                                                                                                                                                                                                                                                                                                  | 4 (4.4%)                                   | 27 (3.0%)                  |         |
| 2B                                                                                                                                                                                                                                                                                                                                                                                                                  | 1 (1.1%)                                   | 27 (3.0%)                  |         |
| 2C                                                                                                                                                                                                                                                                                                                                                                                                                  | 0 (0%)                                     | 16 (1.8%)                  |         |
| 3                                                                                                                                                                                                                                                                                                                                                                                                                   | 1 (1.1%)                                   | 48 (5.4%)                  |         |
| ASPECTS                                                                                                                                                                                                                                                                                                                                                                                                             | 8 [7, 10]                                  | 9 [7, 10]                  | 0.09    |
| ASPECTS ≤ 7                                                                                                                                                                                                                                                                                                                                                                                                         | 38 (41%)                                   | 286 (30%)                  | 0.05    |
| Collaterals                                                                                                                                                                                                                                                                                                                                                                                                         |                                            |                            | 0.12    |
| Grade 0 - Absent collaterals                                                                                                                                                                                                                                                                                                                                                                                        | 4 (4.3%)                                   | 66 (7.2%)                  |         |
| Grade 1 - Occluded area filling <50%                                                                                                                                                                                                                                                                                                                                                                                | 27 (29%)                                   | 312 (34%)                  |         |
| Grade 2 - Occluded area filling >50% but <100%                                                                                                                                                                                                                                                                                                                                                                      | 33 (35%)                                   | 345 (38%)                  |         |
| Grade 3 - Occluded area filling 100%                                                                                                                                                                                                                                                                                                                                                                                | 29 (31%)                                   | 192 (21%)                  |         |
| <i>Workflow (in minutes)</i>                                                                                                                                                                                                                                                                                                                                                                                        |                                            |                            |         |
| Time from symptom onset to IV alteplase                                                                                                                                                                                                                                                                                                                                                                             | 26 [21, 30]                                | 24 [18, 31]                | 0.35    |
| Time from symptom onset to admission ER (intervention center)                                                                                                                                                                                                                                                                                                                                                       | 144 [67, 185]                              | 134 [58, 189]              | 0.28    |
| Time from admission ER to groin puncture                                                                                                                                                                                                                                                                                                                                                                            | 62 [40, 94]                                | 66 [38, 100]               | 0.70    |
| Duration procedure                                                                                                                                                                                                                                                                                                                                                                                                  | 72 [50, 98]                                | 60 [39, 85]                | <0.01   |
| Time from symptom onset to reperfusion                                                                                                                                                                                                                                                                                                                                                                              | 272 [226, 334]                             | 264 [212, 326]             | 0.25    |
| <i>Procedural</i>                                                                                                                                                                                                                                                                                                                                                                                                   |                                            |                            |         |
| General anesthetic management                                                                                                                                                                                                                                                                                                                                                                                       | 18 (20%)                                   | 146 (16%)                  | 0.46    |
| Intra-arterial thrombolysis                                                                                                                                                                                                                                                                                                                                                                                         | 5 (5.1%)                                   | 15 (1.5%)                  | 0.03    |
| <i>Summary:</i> Baseline demographics with heparin vs. no heparin. Continuous data are presented as mean (SD) for normal distributed data or as median [IQR] for skewed data. Categorical data are presented as numbers (%).                                                                                                                                                                                        |                                            |                            |         |
| <i>Abbreviations:</i> ACA, anterior cerebral artery; ASPECTS, Alberta stroke program early CT score; DOAC, direct oral anticoagulant; ER, emergency room; eTICI, extended thrombolysis in cerebral infarction including a 2C grade; ICA (T), internal carotid artery (terminus); IV, intravenous; M(segment), middle cerebral artery; mRS, modified Rankin Scale; NIHSS, National Institutes of Health Stroke Scale |                                            |                            |         |

1 **Supplemental table II.** Complete case analysis of the primary and secondary outcomes in  
 2 patients explicitly registered as treated with heparin vs. no heparin.

3

|                                                                                                                                                                                                                                                                                                                                                                                                                                                                                                                                                                                                                                                                                                                                                                                                                                                                                                                                                                                                                                                                                                         | <b>Heparin<br/>(n=398)</b> | <b>No heparin<br/>(n=98)</b> | <b>P-<br/>value</b> | <b>(c)OR, (95% CI)</b> | <b>a(c)OR, (95% CI)*</b> |
|---------------------------------------------------------------------------------------------------------------------------------------------------------------------------------------------------------------------------------------------------------------------------------------------------------------------------------------------------------------------------------------------------------------------------------------------------------------------------------------------------------------------------------------------------------------------------------------------------------------------------------------------------------------------------------------------------------------------------------------------------------------------------------------------------------------------------------------------------------------------------------------------------------------------------------------------------------------------------------------------------------------------------------------------------------------------------------------------------------|----------------------------|------------------------------|---------------------|------------------------|--------------------------|
| <i>Primary outcome</i>                                                                                                                                                                                                                                                                                                                                                                                                                                                                                                                                                                                                                                                                                                                                                                                                                                                                                                                                                                                                                                                                                  |                            |                              |                     |                        |                          |
| mRS at 90 days                                                                                                                                                                                                                                                                                                                                                                                                                                                                                                                                                                                                                                                                                                                                                                                                                                                                                                                                                                                                                                                                                          | 3 [2, 6]                   | 3 [2, 5]                     | 0.77                | 1.06 (0.71-1.57)       | 1.51 (0.73-3.11)         |
| <i>Secondary outcomes</i>                                                                                                                                                                                                                                                                                                                                                                                                                                                                                                                                                                                                                                                                                                                                                                                                                                                                                                                                                                                                                                                                               |                            |                              |                     |                        |                          |
| mRS ≤ 2 at 90 days                                                                                                                                                                                                                                                                                                                                                                                                                                                                                                                                                                                                                                                                                                                                                                                                                                                                                                                                                                                                                                                                                      | 144 (41%)                  | 30 (33%)                     | 0.10                | 1.39 (0.85-2.26)       | 2.21 (0.82-5.97)         |
| Reperfusion after intervention (eTICI ≥ 2B)                                                                                                                                                                                                                                                                                                                                                                                                                                                                                                                                                                                                                                                                                                                                                                                                                                                                                                                                                                                                                                                             | 245 (62%)                  | 53 (55%)                     | 0.25                | 1.33 (0.85-2.09)       | 1.28 (0.52-3.17)         |
| Symptomatic intracranial hemorrhage                                                                                                                                                                                                                                                                                                                                                                                                                                                                                                                                                                                                                                                                                                                                                                                                                                                                                                                                                                                                                                                                     | 25 (6.3%)                  | 1 (1.0%)                     | 0.07                | 6.50 (0.87-48.58)      | 1.83 (0.19-17.31)†       |
| Mortality at 90 days                                                                                                                                                                                                                                                                                                                                                                                                                                                                                                                                                                                                                                                                                                                                                                                                                                                                                                                                                                                                                                                                                    | 105 (30%)                  | 19 (21%)                     | 0.13                | 0.70 (0.25-2.02)       | 0.70 (0.25-2.02)         |
| <p><i>Summary:</i> Complete case analysis of the primary and secondary outcomes in patients explicitly registered as treated with heparin vs. no heparin. Continuous data are presented as median [IQR] for skewed data. Categorical data are presented as numbers (%).</p> <p><i>Abbreviations:</i> a(c)OR, adjusted (common) odds ratio; CI, confidence interval; eTICI, extended thrombolysis in cerebral infarction including a 2C grade; mRS, modified Rankin Scale</p> <p><i>*Variables in the model:</i> (fixed effects) percentage heparin use per 10%, age, sex, NIHSS at admission, pre-stroke mRS, intravenous alteplase, pre-interventional eTICI score, antiplatelet use, direct oral anticoagulant use, coumarin use, previous stroke, diabetes mellitus, intra-arterial thrombolysis, glucose at baseline, systolic blood pressure, anesthesia type, occlusion segment, ASPECTS at baseline, INR, onset to reperfusion, collateral grading, time per month    (random effect) center</p> <p>† Direct oral anticoagulant use and coumarin use not in model due to lack of convergence</p> |                            |                              |                     |                        |                          |
